# Supplementary material
Source: PubMed Central journal article supplement (PMC3730773)

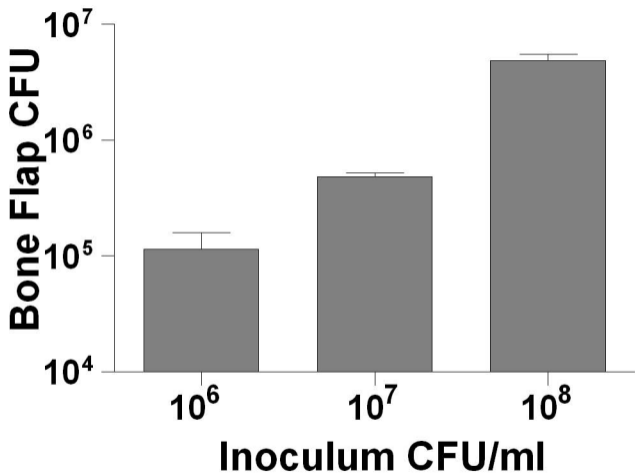

Supplement: mmc1.pdf [file mmc1.pdf]

**Day 7**

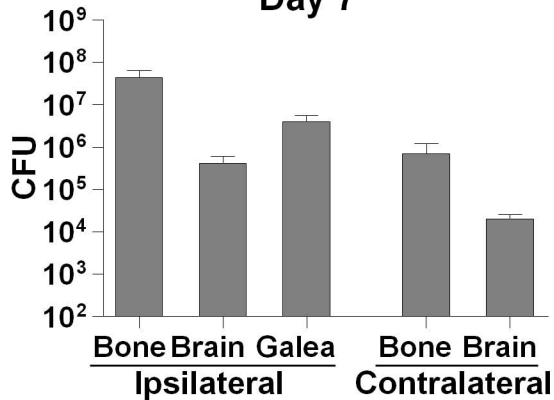

**Day 14**

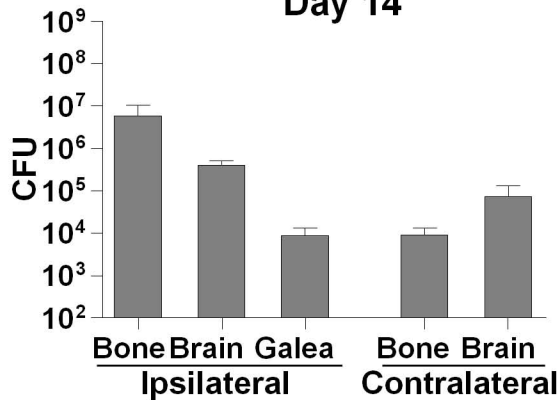

**Day 21**

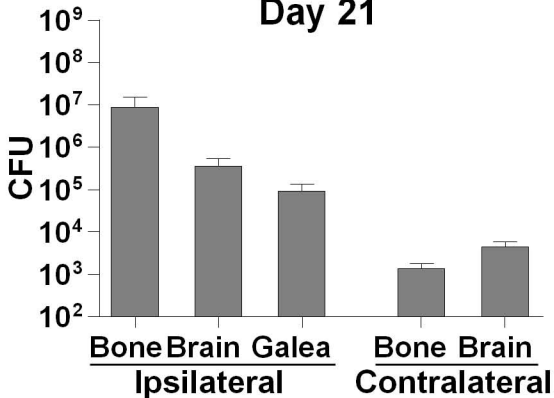

**Day 28**

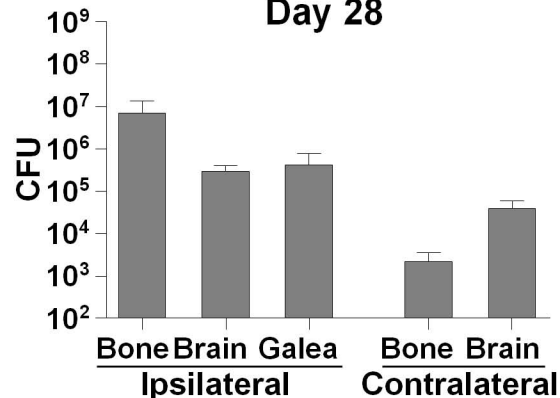

Supplement: mmc2.pdf [file mmc2.pdf]

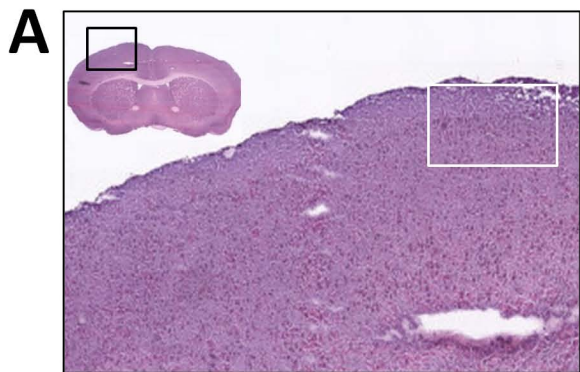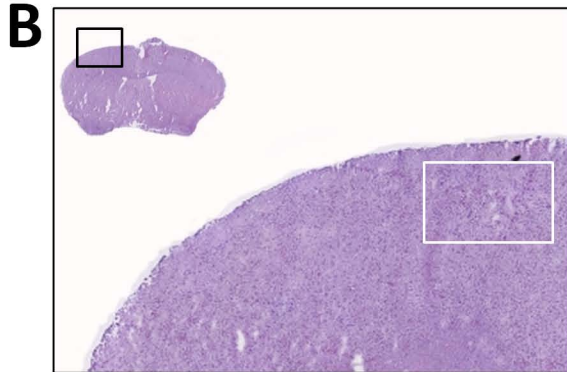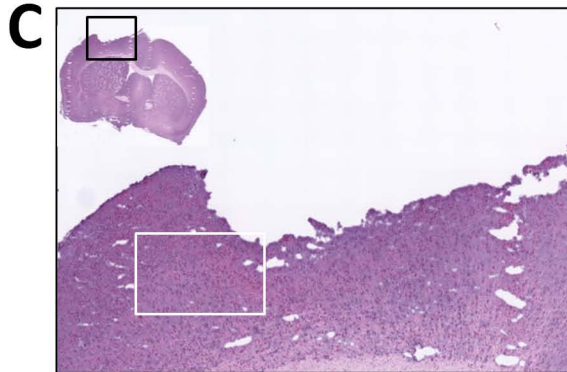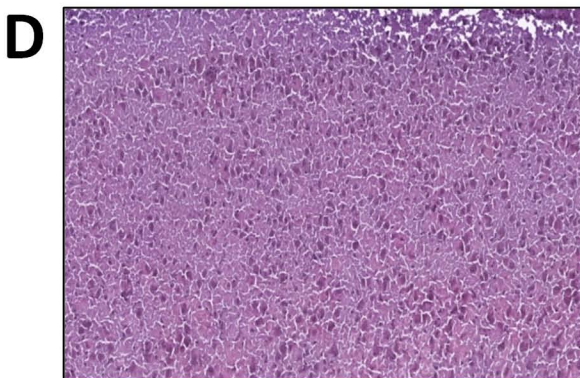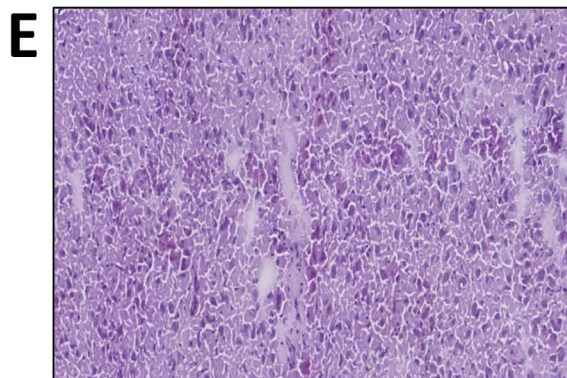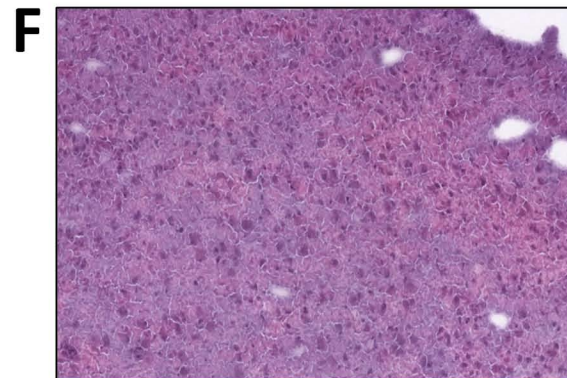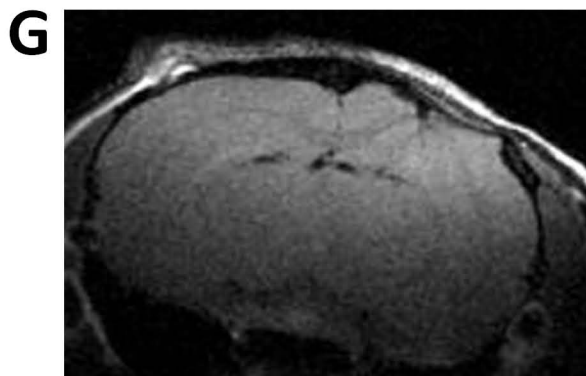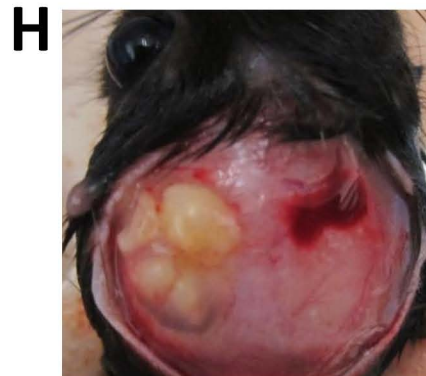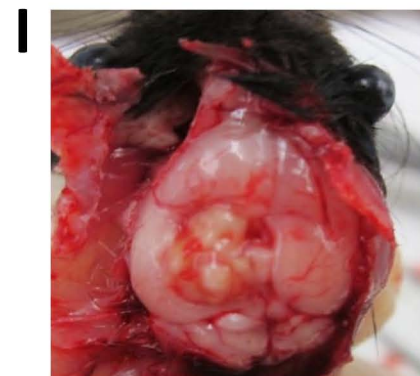

Supplement: mmc3.pdf [file mmc3.pdf]
